# Supplementary material for: Layered Double Hydroxide/Graphene Quantum Dots as a New Sorbent for the Dispersive Solid-Phase Microextraction of Selected Benzophenones, Phenols, and Parabens
Source: MDPI journal article supplement (doi:10.3390/molecules27238388), 2022-12-01
Supplement: s1 [file s1]

## Supplementary Material

### Layered double hydroxide/graphene quantum dots as a new sorbent for the dispersive solid-phase microextraction of selected benzophenones, phenols, and parabens

Theodoros Chatzimitakos \*, Alkiviadis Vasilas and Constantine Stalikas

Laboratory of Analytical Chemistry, Department of Chemistry, University of Ioannina, 45110, Ioannina, Greece

\* Correspondence: t.chatzimitakos@uoi.gr; Tel.: 00302651008725

**Table S1.** Chemical structure, physicochemical characteristics, retention time in the HPLC system, and maximum UV absorbance of the examined compounds.

| Compounds                        | Chemical Structure                                                                  | LogKow | Pka  | Retention time (min) | Maximum UV absorbance (nm) |
|----------------------------------|-------------------------------------------------------------------------------------|--------|------|----------------------|----------------------------|
| 4-hydroxybenzophenone (4OH-BP)   | 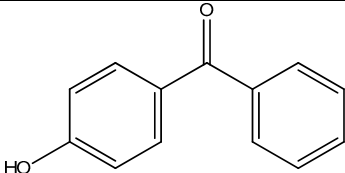 | 3.07   | 8.14 | 14.6                 | 291                        |
| propyl parahydroxybenzoate (PPB) |  | 3.04   | 8.50 | 16.1                 | 254                        |
| butyl 4-hydroxybenzoate (BPB)    |  | 3.57   | 8.47 | 20.6                 | 254                        |
| 2,3,5-trichlorophenol (TCP)      |  | 3.84   | 7.00 | 23.9                 | 286                        |

|                                           |                                                                                   |      |       |      |     |
|-------------------------------------------|-----------------------------------------------------------------------------------|------|-------|------|-----|
| 2-hydroxy-4-methoxybenzophenone<br>(BP-3) | 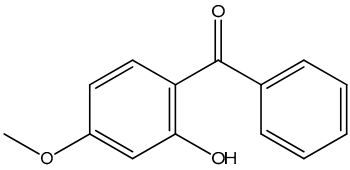 | 3.64 | 7.56  | 27.2 | 286 |
| 4-octylphenol (OCP)                       |  | 4.30 | 10.15 | 31.1 | 276 |

---
